# Supplementary material for: The Association between Daily Dietary Intake of Riboflavin and Lung Function Impairment Related with Dibutyl Phthalate Exposure and the Possible Mechanism
Source: MDPI journal article supplement (doi:10.3390/nu14112282), 2022-05-29
Supplement: s1 [file s1]

**Table S1: The urinary phthalate metabolites of study population and the difference between groups with and without lung function impairment**

|                      | Total      | Lung function impairment |            | P     |
|----------------------|------------|--------------------------|------------|-------|
|                      |            | No                       | Yes        |       |
| Mono                 |            |                          |            |       |
| carboxyisononyl      | 5.51 ±0.95 | 5.51 ±0.96               | 5.49 ±0.90 | 0.488 |
| phthalate            |            |                          |            |       |
| Mono carboxyoctyl    | 7.01 ±1.28 | 7.02 ±1.27               | 6.94 ±1.29 | 0.113 |
| phthalate            |            |                          |            |       |
| Mono-2-ethyl-5-      |            |                          |            |       |
| carboxypentyl        | 7.59 ±0.99 | 7.59 ±0.99               | 7.60 ±0.98 | 0.751 |
| phthalate            |            |                          |            |       |
| Mono-n-butyl         | 7.18 ±0.97 | 7.18 ±0.96               | 7.19 ±0.97 | 0.871 |
| phthalate            |            |                          |            |       |
| Mono-(3-             |            |                          |            |       |
| carboxypropyl)       | 5.59 ±1.08 | 5.58 ±1.09               | 5.64 ±1.00 | 0.120 |
| phthalate            |            |                          |            |       |
| Mono-ethyl phthalate | 8.95 ±1.43 | 8.94 ±1.43               | 8.99 ±1.38 | 0.333 |
| Mono-(2-ethyl-5-     |            |                          |            |       |
| hydroxyhexyl)        | 7.15 ±1.06 | 7.15 ±1.07               | 7.17 ±1.03 | 0.564 |
| phthalate            |            |                          |            |       |

|                                         |            |            |            |       |
|-----------------------------------------|------------|------------|------------|-------|
| Mono-(2-ethyl)-hexyl<br>phthalate       | 5.22 ±1.12 | 5.24 ±1.13 | 5.14 ±1.06 | 0.027 |
| Mono-isobutyl<br>phthalate              | 6.58 ±0.82 | 6.60 ±0.81 | 6.49 ±0.83 | 0.001 |
| Mono-isononyl<br>phthalate              | 4.68 ±1.15 | 4.69 ±1.15 | 4.66 ±1.12 | 0.531 |
| Mono-(2-ethyl-5-<br>oxohexyl) phthalate | 6.64 ±1.01 | 6.64 ±1.01 | 6.66 ±0.99 | 0.599 |
| Mono-benzyl<br>phthalate                | 6.32 ±0.98 | 6.30 ±0.98 | 6.40 ±0.96 | 0.007 |
| DEHP                                    | 8.38 ±0.97 | 8.38 ±0.98 | 8.39 ±0.95 | 0.733 |

---

Lung function impairment: decline in lung function: best test FEV1/FVC ratio

below lower limit of normal and/or less than 70%. DEHP: di-2-ethylhexyl

phthalate, DEHP= Mono-2-ethyl-5-carboxypentyl phthalate+ Mono-(2-ethyl-5-

hydroxyhexyl) phthalate, + Mono-(2-ethyl)-hexyl phthalate + Mono-(2-ethyl-5-

oxohexyl) phthalate. UPMs: urinary phthalate metabolites. The ln transformed of

[urinary phthalate metabolites (ng/L)/ urinary creatinine (g/dL)] were used in the

analysis.

**Table S2: The blood cells of study population and the difference between groups with and without lung function impairment**

|                               | Total            | Lung function impairment |                  | P      |
|-------------------------------|------------------|--------------------------|------------------|--------|
|                               |                  | No                       | Yes              |        |
| Blood cells                   |                  |                          |                  |        |
| Monocyte percent (%)          | 7.62 ±2.27       | 7.60 ±2.26               | 7.71 ±2.33       | 0.261  |
| Neutrophils percent (%)       | 57.92 ±9.51      | 57.79 ±9.46              | 58.61 ±9.73      | 0.041  |
| Eosinophils percent (%)       | 2.82 ±2.08       | 2.79 ±2.10               | 2.98 ±1.95       | 0.024  |
| Basophils percent (%)         | 0.69 ±0.55       | 0.69 ±0.55               | 0.69 ±0.58       | 0.825  |
| Monocyte number (cells/uL)    | 529.34 ±183.65   | 524.46 ±180.27           | 554.93 ±198.65   | <0.001 |
| Neutrophils number (cells/uL) | 4259.81 ±2071.89 | 4227.04 ±2127.74         | 4431.69 ±1741.19 |        |
| Eosinophils number (cells/uL) | 200.14 ±200.36   | 197.53 ±208.85           | 213.8 ±147.40    |        |
| Basophils number (cells/uL)   | 40.41 ±93.58     | 40.09 ±98.56             | 42.11 ±61.15     | 0.012  |
|                               |                  |                          |                  | 0.471  |

Lung function impairment: best test FEV1/FVC ratio below lower limit of normal and/or less than 70%.

**Table S3: The blood cells of study population according to the concentration of urinary MBP**

| Blood cells                    | Quartile of ln(MBP/Ucr), range (median) |                |               |                | P <sub>trend</sub> |
|--------------------------------|-----------------------------------------|----------------|---------------|----------------|--------------------|
|                                | 2.15~5.69                               | 5.69~6.31      | 6.31~6.93     | 6.93~10.20     |                    |
|                                | (5.23)                                  | (6.03)         | (6.59)        | (7.40)         |                    |
| <b>Monocyte percent (%)</b>    | 7.64 ±2.15                              | 7.6 ±2.29      | 7.70 ±2.35    | 7.53 ±2.30     | 0.463              |
| <b>Neutrophils percent (%)</b> | 57.46 ±8.98                             | 57.8 ±9.90     | 57.96 ±9.66   | 58.47 ±9.45    | 0.012              |
| <b>Eosinophils percent (%)</b> | 2.76 ±1.88                              | 2.88 ±2.19     | 2.82 ±1.98    | 2.83 ±2.23     | 0.633              |
| <b>Basophils percent (%)</b>   | 0.72 ±0.57                              | 0.69 ±0.58     | 0.66 ±0.47    | 0.69 ±0.59     | 0.116              |
| <b>Monocyte number</b>         | 510.29 ±172.93                          | 519.58 ±178.28 | 540.4 ±186.68 | 547.01 ±193.75 | <0.001             |

(cells/uL

)

**Neutrop**

**hils**

|         |         |         |         |      |
|---------|---------|---------|---------|------|
| 4028.43 | 4172.29 | 4298.82 | 4537.27 | <0.0 |
|---------|---------|---------|---------|------|

**number**

|          |          |          |          |    |
|----------|----------|----------|----------|----|
| ±1513.40 | ±1756.88 | ±1759.86 | ±2918.24 | 01 |
|----------|----------|----------|----------|----|

(cells/uL

)

**Eosinop**

**hils**

|        |        |        |        |      |
|--------|--------|--------|--------|------|
| 189.62 | 196.66 | 200.09 | 214.03 | 0.00 |
|--------|--------|--------|--------|------|

**number**

|         |         |         |         |   |
|---------|---------|---------|---------|---|
| ±145.24 | ±161.12 | ±149.04 | ±300.76 | 4 |
|---------|---------|---------|---------|---|

(cells/uL

)

**Basophil**

**s**

|  |  |  |       |      |
|--|--|--|-------|------|
|  |  |  | 44.59 | 0.30 |
|--|--|--|-------|------|

**number**

|              |              |             |
|--------------|--------------|-------------|
| 39.89 ±60.69 | 39.17 ±63.05 | 37.94 ±65.9 |
|--------------|--------------|-------------|

|         |   |
|---------|---|
| ±151.16 | 1 |
|---------|---|

(cells/uL

)

---

ln(MBP/Ucr): ln[mono-benzyl phthalate(ng/L)/urinary creatinine(g/dL)]; MBP:

mono-benzyl phthalate.

**Table S4: Association between FeNO, eosinophil and urinary MBP**

| Outcomes        | Model    | Quartiles of ln(MBP/UCr), range (median) |                   |                   |                   | P <sub>trend</sub> |
|-----------------|----------|------------------------------------------|-------------------|-------------------|-------------------|--------------------|
|                 |          | 2.15~5.6                                 | 5.69~6.31         | 6.31~6.93         | 6.93~10.20        |                    |
|                 |          | 9 (5.23)                                 | (6.03)            | (6.59)            | (7.40)            |                    |
| FeNO            | Model 11 | 1.00<br>(Reference)                      | 0.93 (0.74, 1.16) | 0.85 (0.68, 1.06) | 0.84 (0.67, 1.05) | 0.092              |
|                 | Model 12 | 1.00<br>(Reference)                      | 0.99 (0.79, 1.24) | 0.98 (0.78, 1.23) | 1.05 (0.83, 1.32) | 0.737              |
|                 | Model 13 | 1.00<br>(Reference)                      | 1.08 (0.85, 1.36) | 1.06 (0.83, 1.35) | 1.17 (0.92, 1.50) | 0.243              |
|                 | Model 14 | 1.00<br>(Reference)                      | 1.07 (0.85, 1.36) | 1.06 (0.83, 1.34) | 1.17 (0.92, 1.50) | 0.251              |
| High eosinophil | Model 11 | 1.00<br>(Reference)                      | 1.08 (0.82, 1.41) | 1.00 (0.76, 1.31) | 1.18 (0.91, 1.54) | 0.300              |

|      |          |             |             |             |      |
|------|----------|-------------|-------------|-------------|------|
|      | 1.00     |             |             |             |      |
| Mode | (Referen | 1.11 (0.85, | 1.07 (0.81, | 1.31 (1.00, | 0.07 |
| 12   | ce)      | 1.46)       | 1.4)        | 1.71)       | 8    |
|      |          |             |             |             |      |
|      | 1.00     |             |             |             |      |
| Mode | (Referen | 1.08 (0.82, | 1.00 (0.75, | 1.21 (0.91, | 0.27 |
| 13   | ce)      | 1.43)       | 1.33)       | 1.61)       | 5    |
|      |          |             |             |             |      |
|      | 1.00     |             |             |             |      |
| Mode | (Referen | 1.09 (0.83, | 1.02 (0.77, | 1.23 (0.93, | 0.22 |
| 14   | ce)      | 1.44)       | 1.36)       | 1.63)       | 2    |

---

ln(MBP/UCr): ln[mono-benzyl phthalate(ng/L)/urinary creatinine(g/dL)]; MBP:

mono-benzyl phthalate; FeNO: fractional exhaled nitrous oxide; high eosinophil:

the number of eosinophil  $\geq 500$  cells/ul or the eosinophil percent  $\geq 5\%$ ;

Model1: Unadjusted model

Model2: Adjusted for gender (man or woman), age (years old), race(Mexican American, other Hispanic, Non-Hispanic White, Non-Hispanic Black, and Other Race), education (below high school, high school, above high school)

Model3: Adjusted for gender (man or woman), age (years old), race(Mexican American, other Hispanic, Non-Hispanic White, Non-Hispanic Black, and Other Race), education (below high school, high school, above high school), BMI (kg/m<sup>2</sup>), history of diabetes (yes or no), smoker status(never,former, current), and hypertension(yes or no).



Model4: Adjusted for gender (man or woman), age (years old), race(Mexican American, other Hispanic, Non-Hispanic White, Non-Hispanic Black, and Other Race), education (below high school, high school, above high school), history of diabetes (yes or no), and hypertension(yes or no).

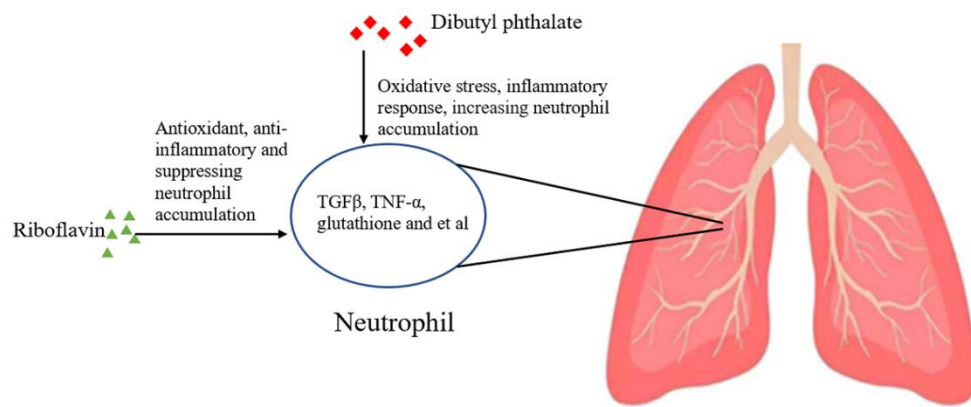

Figure S1: the potential biochemical and cell biological mechanisms of the riboflavin on lung function. Riboflavin exerted both the antioxidant and anti-inflammatory effects against acetic acid-induced colonic inflammation by suppressing neutrophil accumulation, inhibiting reactive oxidant generation. The decreasing level of TGFβ and TNF-α, and increasing levels of glutathione in neutrophil may be the potential antioxidant and anti-inflammatory effects of riboflavin.
